# Supplementary material for: Sex Hormone–Binding Globulin, but Not Testosterone, Is Associated Prospectively and Independently With Incident Metabolic Syndrome in Men
Source: Oxford University Press journal article supplement (doi:10.2337/dc11-0888), 2011-09-17
Supplement: dc110888supplementarydata.pdf [file dc110888supplementarydata.pdf]

SUPPLEMENTARY DATA

**Supplementary Table 1. Odds ratios for Metabolic Syndrome Across Quartiles of Testosterone, Free Testosterone and SHBG in Generation 2 Cross-Sectional Analyses (N=1407)**

| Variable                         | Successive Covariable Adjustment |                |             |             |
|----------------------------------|----------------------------------|----------------|-------------|-------------|
|                                  | Age +smoke                       | SHBG           | BMI         | All*        |
| <b>Testosterone (ng/dL)</b>      |                                  |                |             |             |
| Q1                               | 4.46                             | 2.79           | 1.46        | 1.11        |
|                                  | (3.24-6.14)                      | (1.93-4.04)    | (0.97-2.21) | (0.71-1.73) |
|                                  | <0.0001                          | <0.0001        | 0.07        | 0.6         |
| Q2                               | 3.00                             | 2.17           | 1.59        | 1.28        |
|                                  | (2.19-4.10)                      | (1.55-3.05)    | (1.10-2.31) | (0.87-1.90) |
|                                  | <0.0001                          | <0.0001        | 0.0138      | 0.2213      |
| Q3                               | 1.65                             | 1.34           | 1.12        | 0.99        |
|                                  | (1.20-2.26)                      | (0.97-1.86)    | (0.78-1.60) | (0.68-1.45) |
|                                  | 0.0019                           | 0.0765         | 0.5359      | 0.9536      |
| Q4                               | 1.00                             |                |             |             |
| <b>Free Testosterone (pg/mL)</b> |                                  |                |             |             |
| Q1                               | 1.92                             | 2.20           | 1.35        | 1.08        |
|                                  | (1.40-2.64)                      | (1.58-3.07)    | (0.93-1.96) | (0.72-1.61) |
|                                  | <0.0001                          | <0.0001        | 0.1134      | 0.7127      |
| Q2                               | 1.74                             | 1.78           | 1.36        | 1.21        |
|                                  | (1.28-2.37)                      | (1.30-2.45)    | (0.96-1.93) | (0.83-1.76) |
|                                  | 0.0004                           | 0.0004         | 0.0886      | 0.3141      |
| Q3                               | 1.16                             | 1.25           | 1.12        | 1.00        |
|                                  | (0.86-1.57)                      | (0.92-1.71)    | (0.80-1.58) | (0.70-1.45) |
|                                  | 0.3455                           | 0.1567         | 0.5070      | 0.9899      |
| Q4                               | 1.00                             |                |             |             |
| <b>SHBG</b>                      |                                  |                |             |             |
|                                  | <b>Age +Smoke</b>                | <b>Total T</b> | <b>BMI</b>  | <b>All*</b> |
| Q1                               | 5.12                             | 2.71           | 2.70        | 2.55        |
|                                  | (3.64-7.21)                      | (1.82-4.04)    | (1.74-4.19) | (1.60-4.07) |
|                                  | <0.0001                          | <0.0001        | <0.0001     | <0.0001     |
| Q2                               | 2.17                             | 1.46           | 1.43        | 1.33        |

SUPPLEMENTARY DATA

|    |             |             |             |             |
|----|-------------|-------------|-------------|-------------|
|    | (1.58-2.99) | (1.03-2.07) | (0.98-2.10) | (0.88-1.99) |
|    | <0.0001     | 0.0326      | 0.0660      | 0.1759      |
| Q3 | 1.96        | 1.50        | 1.55        | 1.57        |
|    | (1.43-2.69) | (1.08-2.09) | (1.07-2.22) | (1.07-2.32) |
|    | <0.0001     | 0.0156      | 0.0190      | 0.0227      |
| Q4 | 1.00        |             |             |             |

For each subsequent model after the first (which included only age and smoking), covariates were sequentially added to each following model. \*In the final model, the model was adjusted for age, smoke, SHBG (Total T for SHBG as a predictor), BMI, and HOMA-IR.

SUPPLEMENTARY DATA

**Supplementary Table 2. Odds ratios for Metabolic Syndrome Across Quartiles of Testosterone, Free Testosterone and SHBG in the Cross-Sectional Analyses of Generation 3 Validation Sample (N=1887)**

| Variable                         | Successive Covariable Adjustment |             |             |             |
|----------------------------------|----------------------------------|-------------|-------------|-------------|
|                                  | Age +smoke                       | SHBG        | BMI         | All*        |
| <b>Testosterone (ng/dL)</b>      |                                  |             |             |             |
| Q1                               | 8.69                             | 5.64        | 2.50        | 1.84        |
|                                  | (6.1-12.4)                       | (3.81-8.33) | (1.63-3.84) | (1.18-2.89) |
|                                  | <0.0001                          | <0.0001     | <0.0001     | 0.0078      |
| Q2                               | 3.13                             | 2.42        | 1.55        | 1.32        |
|                                  | (2.17-4.51)                      | (1.64-3.56) | (1.02-2.35) | (0.85-2.03) |
|                                  | <0.0001                          | <0.0001     | 0.0392      | 0.2121      |
| Q3                               | 2.13                             | 1.85        | 1.30        | 1.11        |
|                                  | (1.47-3.11)                      | (1.25-2.73) | (0.85-1.97) | (0.71-1.72) |
|                                  | <0.0001                          | 0.0021      | 0.2221      | 0.6473      |
| Q4                               | 1.00                             |             |             |             |
| <b>Free Testosterone (pg/mL)</b> |                                  |             |             |             |
| Q1                               | 2.71                             | 3.92        | 2.02        | 1.64        |
|                                  | (1.97-3.74)                      | (2.79-5.51) | (1.38-2.96) | (1.10-2.45) |
|                                  | <0.0001                          | <0.0001     | 0.0003      | 0.0163      |
| Q2                               | 1.92                             | 2.55        | 1.81        | 1.61        |
|                                  | (1.39-2.66)                      | (1.82-3.59) | (1.25-2.63) | (1.09-2.39) |
|                                  | <0.0001                          | <0.0001     | 0.0018      | 0.0166      |
| Q3                               | 1.42                             | 1.69        | 1.37        | 1.30        |
|                                  | (1.02-1.99)                      | (1.19-2.39) | (0.94-2.00) | (0.87-1.93) |
|                                  | 0.0393                           | 0.0032      | 0.0992      | 0.1963      |
| Q4                               | 1.00                             |             |             |             |
| <b>SHBG</b>                      |                                  |             |             |             |
|                                  | Age +Smoke                       | Total T     | BMI         | All*        |
| Q1                               | 6.11                             | 2.77        | 2.35        | 2.12        |
|                                  | (4.38-8.51)                      | (1.92-4.00) | (1.57-3.54) | (1.38-3.26) |
|                                  | <0.0001                          | <0.0001     | <0.0001     | 0.0007      |
| Q2                               | 2.50                             | 1.41        | 1.42        | 1.42        |

SUPPLEMENTARY DATA

|    |             |             |             |             |
|----|-------------|-------------|-------------|-------------|
|    | (1.78-3.51) | (0.98-2.03) | (0.96-2.12) | (0.93-2.17) |
|    | <0.0001     | 0.0064      | 0.0817      | 0.1030      |
| Q3 | 2.08        | 1.51        | 1.40        | 1.54        |
|    | (1.48-2.91) | (1.06-2.15) | (0.95-1.06) | (1.02-2.34) |
|    | <0.0001     | 0.0236      | 0.0934      | 0.0403      |
| Q4 | 1.00        |             |             |             |

For each subsequent model after the first model (which included only age and smoking), covariates were sequentially added to each following model. \*In the final model, the model was adjusted for age, smoke, SHBG (Total T for SHBG as a predictor), BMI, and HOMA-IR.

SUPPLEMENTARY DATA

**Supplementary Table 3. Odds ratios for Metabolic Syndrome Across Quartiles of Testosterone, Free Testosterone and SHBG in Gen 2 Longitudinal Analyses (N=618)**

| Variable                         | Successive Covariable Adjustment |                |             |             |
|----------------------------------|----------------------------------|----------------|-------------|-------------|
|                                  | Age +smoke                       | SHBG           | BMI         | All*        |
| <b>Testosterone (ng/dL)</b>      |                                  |                |             |             |
| Q1                               | 1.71                             | 0.99           | 0.74        | 0.64        |
|                                  | (1.01-2.88)                      | (0.53-1.86)    | (0.38-1.44) | (0.33-1.27) |
|                                  | 0.0448                           | 0.9707         | 0.3710      | 0.2020      |
| Q2                               | 1.40                             | 0.96           | 0.82        | 0.71        |
|                                  | (0.83-2.39)                      | (0.54-1.73)    | (0.45-1.50) | (0.38-1.32) |
|                                  | 0.2106                           | 0.9027         | 0.5111      | 0.2739      |
| Q3                               | 1.14                             | 0.87           | 0.83        | 0.77        |
|                                  | (0.66-1.97)                      | (0.49-1.55)    | (0.46-1.48) | (0.42-1.41) |
|                                  | 0.6341                           | 0.6409         | 0.5201      | 0.3984      |
| Q4                               | 1.00                             |                |             |             |
| <b>Free Testosterone (pg/mL)</b> |                                  |                |             |             |
| Q1                               | 1.04                             | 1.08           | 0.77        | 0.68        |
|                                  | (0.60-1.79)                      | (0.62-1.86)    | (0.43-1.38) | (0.38-1.24) |
|                                  | 0.8938                           | 0.7981         | 0.3831      | 0.2121      |
| Q2                               | 1.07                             | 1.10           | 0.94        | 0.91        |
|                                  | (0.62-1.82)                      | (0.64-1.88)    | (0.54-1.64) | (0.52-1.59) |
|                                  | 0.8179                           | 0.7403         | 0.8364      | 0.7414      |
| Q3                               | 1.28                             | 1.38           | 1.21        | 1.15        |
|                                  | (0.76-2.13)                      | (0.82-2.33)    | (0.70-2.06) | (0.66-1.99) |
|                                  | 0.3546                           | 0.2234         | 0.4978      | 0.6233      |
| Q4                               | 1.00                             |                |             |             |
| <b>SHBG</b>                      |                                  |                |             |             |
|                                  | <b>Age +Smoke</b>                | <b>Total T</b> | <b>BMI</b>  | <b>All*</b> |
| Q1                               | 2.56                             | 2.60           | 2.44        | 2.73        |
|                                  | (1.45-4.50)                      | (1.33-5.10)    | (1.21-4.90) | (1.33-5.62) |
|                                  | 0.0012                           | 0.0054         | 0.0123      | 0.0064      |
| Q2                               | 2.20                             | 2.23           | 2.28        | 2.39        |

SUPPLEMENTARY DATA

|    |             |             |             |             |
|----|-------------|-------------|-------------|-------------|
|    | (1.28-3.81) | (1.22-4.07) | (1.22-4.27) | (1.25-4.57) |
|    | 0.0046      | 0.0089      | 0.0096      | 0.0082      |
| Q3 | 1.16        | 1.17        | 1.20        | 1.31        |
|    | (0.65-2.07) | (0.64-2.14) | (0.65-2.24) | (0.69-2.49) |
|    | 0.6089      | 0.6042      | 0.5588      | 0.4139      |
| Q4 | 1.00        |             |             |             |

For each subsequent model after the first model (which included only age and smoking), covariates were sequentially added to each following model. \*In the final model, the model was adjusted for age, smoke, SHBG (Total T for SHBG as a predictor), BMI, and HOMA-IR.

SUPPLEMENTARY DATA

**Supplementary Table 4. Cross-sectional association of SHBG with the Individual Components of the Metabolic Syndrome in the Framingham Heart Study Generation 2 Sample (N=1407)**

|                                                        | <b>Adjusted for age and smoking</b> | <b>Adjusted* for Total T</b>   | <b>Adjusted* for BMI</b>       | <b>Adjusted* for HOMA</b>      |
|--------------------------------------------------------|-------------------------------------|--------------------------------|--------------------------------|--------------------------------|
| <b>Elevated Blood Pressure</b>                         | 1.30<br>(1.15-1.47)<br><0.0001      | 1.08<br>(0.93-1.26)<br>0.32    | 1.06<br>(0.91-1.24)<br>0.44    | 1.07<br>(0.92-1.26)<br>0.38    |
| <b>Elevated Waist Circumference</b>                    | 1.47<br>(1.31-1.66)<br><0.0001      | 1.06<br>(0.91-1.22)<br>0.47    | 0.82<br>(0.65-1.03)<br>0.08    | 0.78<br>(0.62-0.99)<br>0.04    |
| <b>Low HDL Cholesterol</b>                             | 1.36<br>(1.20-1.54)<br><0.0001      | 1.17<br>(1.01-1.36)<br>0.04    | 1.14 (0.98-1.33)<br>0.09       | 1.15<br>(0.98-1.35)<br>0.08    |
| <b>Elevated fasting glucose or diabetes medication</b> | 1.39<br>(1.24-1.57)<br><0.0001      | 1.15<br>(0.99-1.33)<br>0.07    | 1.12<br>(0.97-1.31)<br>0.12    | 1.16<br>(0.98-1.36)<br>0.08    |
| <b>Elevated Triglycerides</b>                          | 2.08<br>(1.79-2.43)<br><0.0001      | 1.94<br>(1.61-2.33)<br><0.0001 | 1.91<br>(1.59-2.30)<br><0.0001 | 2.04<br>(1.68-2.47)<br><0.0001 |

Odds ratios per 1 SD difference in SHBG are shown, along with 95% confidence intervals and p-values  
 \*Moving left to right, covariates were sequentially added to the previous model

SUPPLEMENTARY DATA

**Supplementary Table 5. Cross-sectional association of SHBG with the Individual Components of the Metabolic Syndrome in the Framingham Heart Study Generation 3 Sample (N=1887)**

|                                                        | <b>Adjusted for age and smoking</b> | <b>Adjusted* for Total T</b>   | <b>Adjusted* for BMI</b>       | <b>Adjusted* for HOMA</b>      |
|--------------------------------------------------------|-------------------------------------|--------------------------------|--------------------------------|--------------------------------|
| <b>Elevated Blood Pressure</b>                         | 1.37<br>(1.23-1.52)<br><0.0001      | 1.19<br>(1.06-1.34)<br>0.004   | 1.12<br>(0.99-1.27)<br>0.06    | 1.15<br>(1.01-1.31)<br>0.04    |
| <b>Elevated Waist Circumference</b>                    | 1.75<br>(1.56-1.97)<br><0.0001      | 1.25<br>(1.10-1.42)<br>0.0008  | 1.00<br>(0.81-1.23)<br>0.99    | 1.00<br>(0.80-1.24)<br>0.96    |
| <b>Low HDL Cholesterol</b>                             | 1.59<br>(1.41-1.78)<br><0.0001      | 1.26<br>(1.10-1.43)<br>0.0006  | 1.21<br>(1.06-1.38)<br>0.004   | 1.19<br>(1.04-1.36)<br>0.01    |
| <b>Elevated fasting glucose or diabetes medication</b> | 1.31<br>(1.18-1.46)<br><0.0001      | 1.12<br>(1.00-1.27)<br>0.06    | 1.07<br>(0.95-1.21)<br>0.27    | 1.02<br>(0.89-1.16)<br>0.82    |
| <b>Elevated Triglycerides</b>                          | 1.99<br>(1.75-2.25)<br><0.0001      | 1.55<br>(1.35-1.78)<br><0.0001 | 1.50<br>(1.31-1.73)<br><0.0001 | 1.47<br>(1.27-1.70)<br><0.0001 |

Odds ratios per 1 SD difference in SHBG are shown, along with 95% confidence intervals and p-values

\*Moving left to right, covariates were sequentially added to the previous model



SUPPLEMENTARY DATA

**Supplementary Table 6. Prospective association of SHBG with the Individual Components of the Metabolic Syndrome in the Framingham Heart Study Generation 2 Sample (N=618)**

Odds ratios per 1 SD difference in SHBG are shown, along with 95% confidence intervals and

|                                                        | <b>Adjusted for age and smoking</b> | <b>Adjusted* for Total T</b>  | <b>Adjusted* for BMI</b>      | <b>Adjusted* for HOMA</b>     |
|--------------------------------------------------------|-------------------------------------|-------------------------------|-------------------------------|-------------------------------|
| <b>Elevated Blood Pressure</b>                         | 1.22<br>(1.02-1.47)<br>0.0333       | 1.18<br>(0.94-1.49)<br>0.1641 | 1.17<br>(0.92-1.47)<br>0.1982 | 1.20<br>(0.94-1.51)<br>0.1386 |
| <b>Elevated Waist Circumference</b>                    | 1.21<br>(1.02-1.45)<br>0.0340       | 1.04<br>(0.83-1.30)<br>0.75   | 0.87<br>(0.65-1.16)<br>0.34   | 0.87<br>(0.65-1.17)<br>0.36   |
| <b>Low HDL Cholesterol</b>                             | 1.31<br>(0.98-1.76)<br>0.07         | 1.22<br>(0.85-1.74)<br>0.29   | 1.19<br>(0.83-1.71)<br>0.34   | 1.19<br>(0.83-1.71)<br>0.34   |
| <b>Elevated fasting glucose or diabetes medication</b> | 1.18<br>(1.00-1.40)<br>0.06         | 1.36<br>(1.09-1.69)<br>0.006  | 1.35<br>(1.09-1.68)<br>0.007  | 1.40<br>(1.12-1.75)<br>0.003  |
| <b>Elevated Triglycerides</b>                          | 1.70<br>(1.24-2.35)<br>0.001        | 1.62<br>(1.09-2.39)<br>0.02   | 1.64<br>(1.10-2.43)<br>0.01   | 1.65<br>(1.11-2.46)<br>0.01   |

p-values

\*Moving left to right, covariates were sequentially added to the previous model
